# Supplementary material for: Environmental stability of porcine respiratory coronavirus in aquatic environments
Source: PLoS One. 2021 Jul 14;16(7):e0254540. doi: 10.1371/journal.pone.0254540 (PMC8279332; doi:10.1371/journal.pone.0254540)
Supplement: S1 Data — (CSV) [file pone.0254540.s001.csv]

Group	Replicate	Time (d)	TCID50 (Nt)	Log(Nt)	Log(Nt/N0)
PBS	1	0	7943282.347	6.9	0
PBS	1	3	5011872.336	6.7	-0.2
PBS	1	7	1995262.315	6.3	-0.6
PBS	1	10	794328.2347	5.9	-1
PBS	1	14	1122018.454	6.05	-0.85
PBS	1	21	112201.8454	5.05	-1.85
PBS	1	28	11220.18454	4.05	-2.85
PBS	1	35	2884.031503	3.46	-3.44
PBS	1	42	288.4031503	2.46	-4.44
PBS	1	49	19.95262315	1.3	-5.6
PBS	2	0	6309573.445	6.8	0
PBS	2	3	2884031.503	6.46	-0.34
PBS	2	7	6309573.445	6.8	0
PBS	2	10	1995262.315	6.3	-0.5
PBS	2	14	630957.3445	5.8	-1
PBS	2	21	151356.1248	5.18	-1.62
PBS	2	28	19952.62315	4.3	-2.5
PBS	2	35	6309.573445	3.8	-3
PBS	2	42	630.9573445	2.8	-4
PBS	2	49	7.943282347	0.9	-5.9
PBS	3	0	11220184.54	7.05	0
PBS	3	3	1995262.315	6.3	-0.75
PBS	3	7	1995262.315	6.3	-0.75
PBS	3	10	1122018.454	6.05	-1
PBS	3	14	501187.2336	5.7	-1.35
PBS	3	21	151356.1248	5.18	-1.87
PBS	3	28	35481.33892	4.55	-2.5
PBS	3	35	11220.18454	4.05	-3
PBS	3	42	977.237221	2.99	-4.06
PBS	3	49	7.943282347	0.9	-6.15
Scheldt	1	0	6309573.445	6.8	0
Scheldt	1	3	457088.1896	5.66	-1.14
Scheldt	1	7	112201.8454	5.05	-1.75
Scheldt	1	10	501187.2336	5.7	-1.1
Scheldt	1	14	199526.2315	5.3	-1.5
Scheldt	1	21	19952.62315	4.3	-2.5
Scheldt	1	28	457.0881896	2.66	-4.14
Scheldt	1	35	112.2018454	2.05	-4.75
Scheldt	1	42	11.22018454	1.05	-5.75
Scheldt	1	45	6.309573445	0.8	-6
Scheldt	2	0	5011872.336	6.7	0
Scheldt	2	3	2630267.992	6.42	-0.28
Scheldt	2	7	354813.3892	5.55	-1.15
Scheldt	2	10	288403.1503	5.46	-1.24
Scheldt	2	14	63095.73445	4.8	-1.9
Scheldt	2	21	11220.18454	4.05	-2.65
Scheldt	2	28	794.3282347	2.9	-3.8
Scheldt	2	35	63.09573445	1.8	-4.9
Scheldt	2	42	7.943282347	0.9	-5.8
Scheldt	2	45	7.943282347	0.9	-5.8
Scheldt	3	0	4570881.896	6.66	0
Scheldt	3	3	1995262.315	6.3	-0.36
Scheldt	3	7	630957.3445	5.8	-0.86
Scheldt	3	10	346736.8505	5.54	-1.12
Scheldt	3	14	501187.2336	5.7	-0.96
Scheldt	3	21	19952.62315	4.3	-2.36
Scheldt	3	28	794.3282347	2.9	-3.76
Scheldt	3	35	87.096359	1.94	-4.72
Scheldt	3	42	11.22018454	1.05	-5.61
Scheldt	3	45	10	1	-5.66
NorthSea	1	0	794328.2347	5.9	0
NorthSea	1	3	138.0384265	2.14	-3.76
NorthSea	1	7	10	1	-5.8
NorthSea	2	0	1122018.454	6.05	0
NorthSea	2	3	14.79108388	1.17	-4.88
NorthSea	2	7	1.202264435	0.08	-6.62
NorthSea	3	0	3548133.892	6.55	0
NorthSea	3	3	263.0267992	2.42	-4.13
NorthSea	3	7	11.22018454	1.05	-5.61
